# Supplementary material for: Liquid sampling-atmospheric pressure glow discharge excitation of atomic and ionic species
Source: Royal Society of Chemistry journal article supplement (doi:10.1039/c4ja00302k), 2014-11-10
Supplement: c4ja00302k1.pdf [file c4ja00302k1.pdf]

## **SUPPLEMENTARY INFORMATION**

### **Fundamental Studies of the Liquid Sampling–Atmospheric Pressure Glow Discharge’s Excitation of Atomic and Ionic Species**

Stefanie Konegger-Kappel<sup>1</sup>, Benjamin T. Manard<sup>2</sup>, Lynn X. Zhang<sup>1</sup>, Thomas Konegger<sup>3</sup>, and R. Kenneth Marcus<sup>1\*</sup>

<sup>1</sup> - Department of Chemistry, Clemson University, Clemson, South Carolina 29634, USA

<sup>2</sup> - Chemistry Division – Actinide Analytical Chemistry, Los Alamos National Laboratory, Los Alamos, New Mexico 87544, USA

<sup>3</sup> - Department of Materials Science and Engineering, Clemson University, Clemson, South Carolina 29634, USA

\*-Author to whom correspondence should be addressed

Submitted for publication in Journal of Analytical Atomic Spectroscopy, for inclusion in the Special Issue dedicated to Barry Sharp

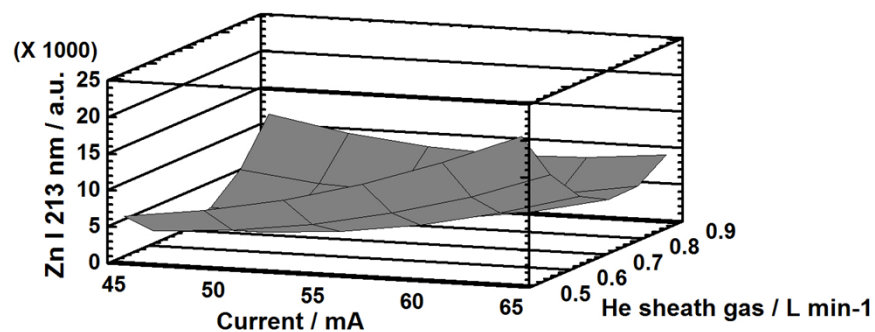

Fig. S1a

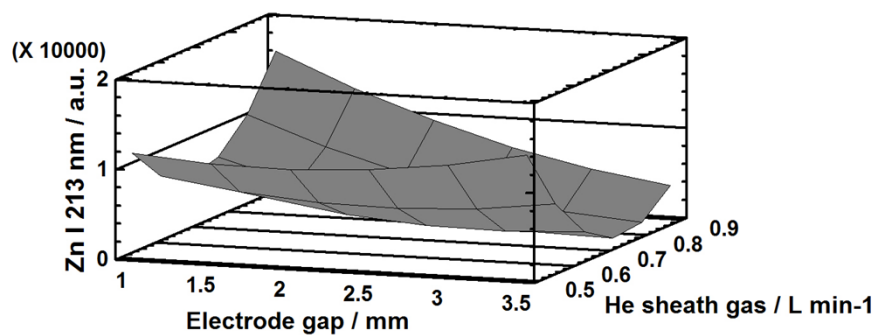

Fig. S1b

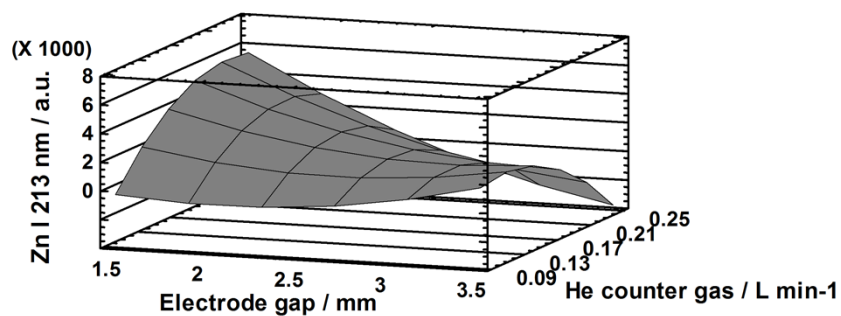

Fig. S1c

Figure S1: Inter-parametric effects on the Zn I 213.9 nm emission response depicted in form of response surfaces showing a) current – He sheath gas, b) electrode gap – He sheath gas, and c) electrode gap – He counter flow relationships. The other conditions not shown in the respective response surfaces were kept constant at 55 mA (current), 0.7 L min<sup>-1</sup> (He sheath gas flow rate), 2.25 mm (electrode gap) and 0.16 L min<sup>-1</sup> (He counter flow).

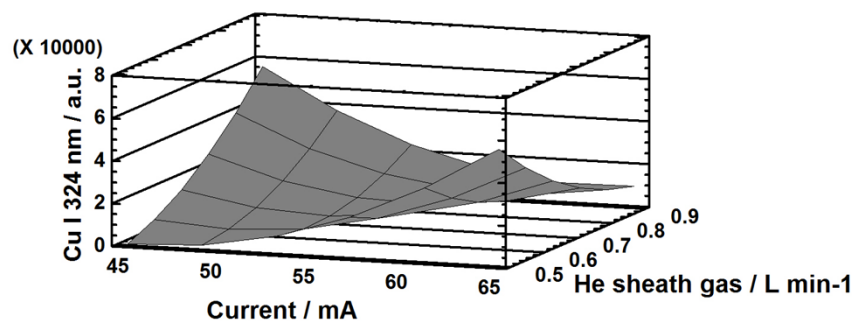

Fig. S2a

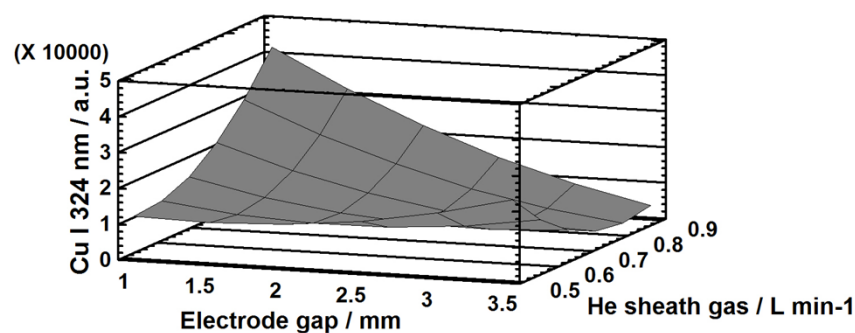

Fig. S2b

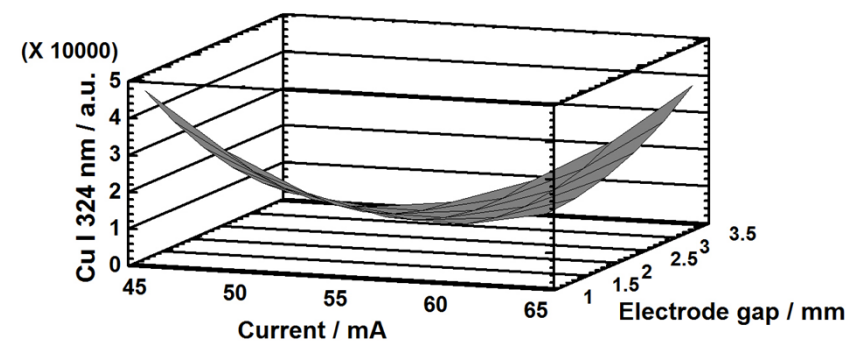

Fig. S2c

Figure S2: Inter-parametric effects on the Cu I 324.7 nm emission response depicted in form of response surfaces showing a) current – He sheath gas, b) electrode gap – He sheath gas, and c) current – electrode gap relationships. The other conditions not shown in the respective response surfaces were kept constant at 55 mA (current), 0.7 L min<sup>-1</sup> (He sheath gas flow rate), 2.25 mm (electrode gap) and 0.16 L min<sup>-1</sup> (He counter flow).

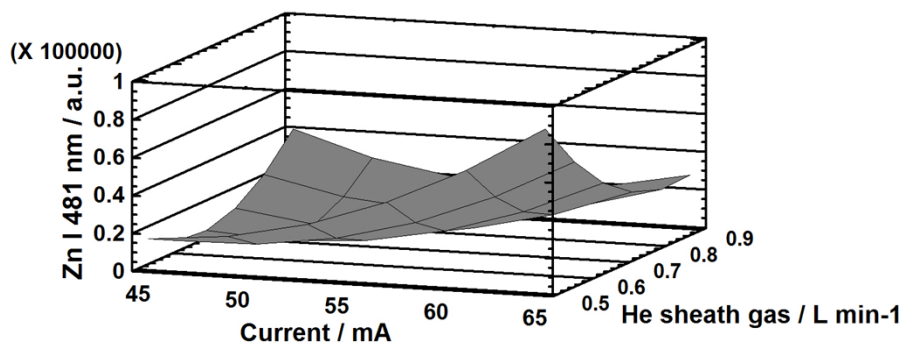

Fig. S3a

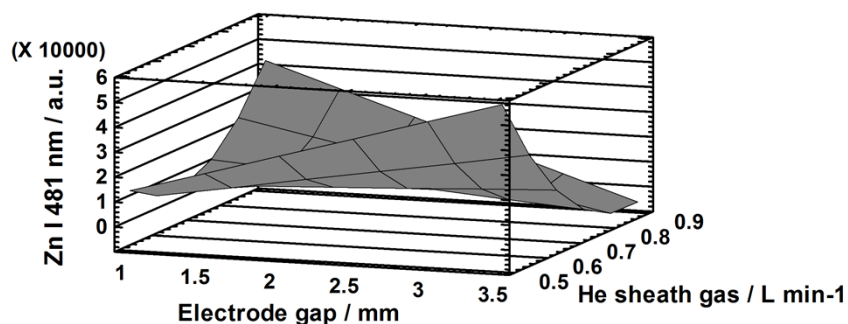

Fig. S3b

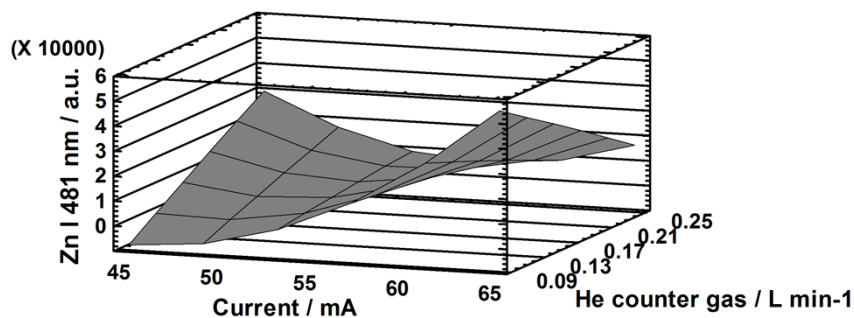

Fig. S3c

Figure S3: Inter-parametric effects on the Zn I 481.1 nm emission response depicted in form of response surfaces showing a) current – He sheath gas, b) electrode gap – He sheath gas, and c) current – He counter flow relationships. The other conditions not shown in the respective response surfaces were kept constant at 55 mA (current), 0.7 L min<sup>-1</sup> (He sheath gas flow rate), 2.25 mm (electrode gap) and 0.16 L min<sup>-1</sup> (He counter flow).

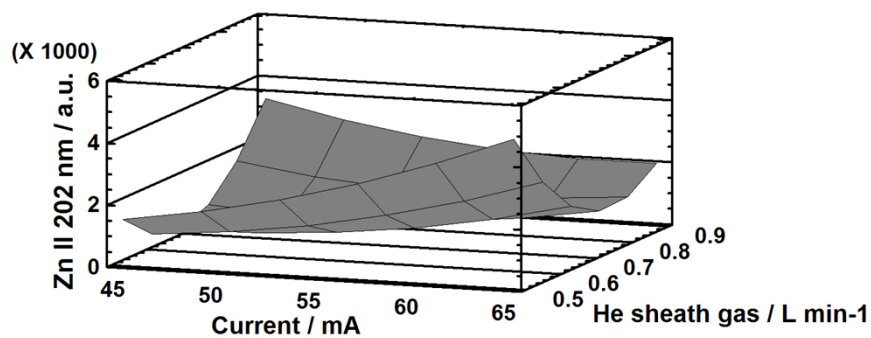

Fig. S4a

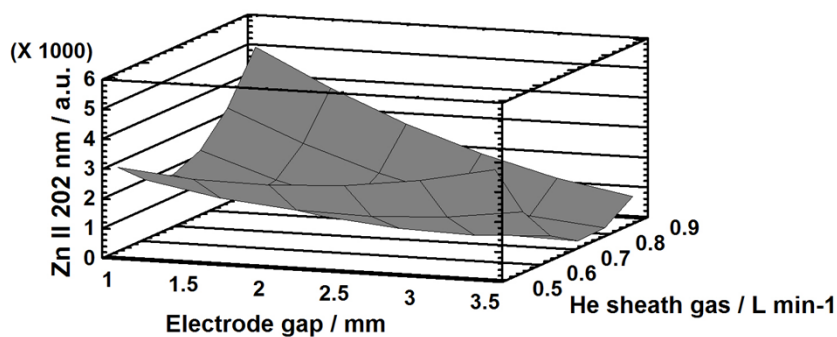

Fig. S4b

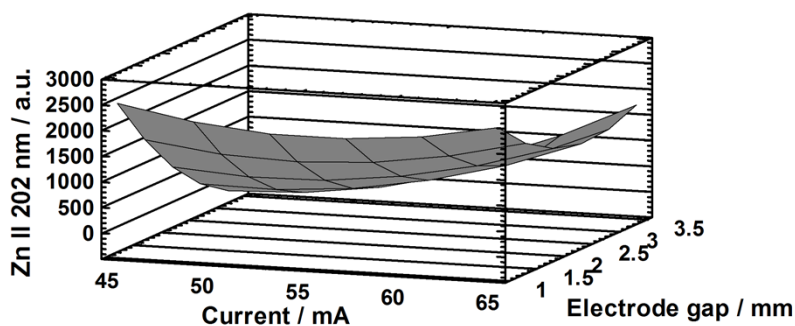

Fig. S4c

Figure S4: Inter-parametric effects on the Zn II 202.5 nm emission response depicted in form of response surfaces showing a) current – He sheath gas, b) electrode gap – He sheath gas, and c) current - electrode gap relationships. The other conditions not shown in the respective response surfaces were kept constant at 55 mA (current), 0.7 L min<sup>-1</sup> (He sheath gas flow rate), 2.25 mm (electrode gap) and 0.16 L min<sup>-1</sup> (He counter flow).
